# Supplementary material for: Tart Cherry Reduces Inflammation in Adipose Tissue of Zucker Fatty Rats and Cultured 3T3-L1 Adipocytes
Source: PubMed Central journal article supplement (PMC6266132; doi:10.3390/nu10111576), 2018-10-25
Supplement: nutrients-10-01576-s001.pdf [file nutrients-10-01576-s001.pdf]

| Standards | Retention time (min) | Molecular ion [m/z] | MS/MS fragmentation ions [m/z] |
|-----------|----------------------|---------------------|--------------------------------|
| Cyanidin  | 20.82                | 287.10              | 213.07                         |
| C3R       | 15.42                | 595.11              | 287.06                         |
| C3G       | 14.87                | 449.22              | 287                            |

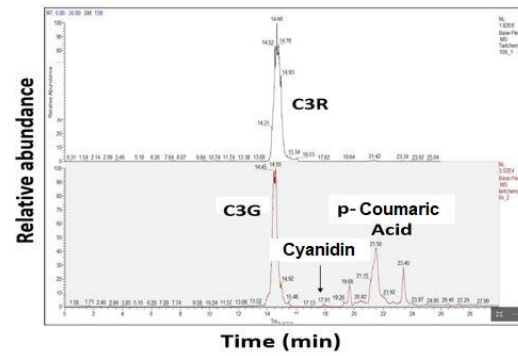

**Figure S1.** Anthocyanin analysis of tart cherry extract (used in cell culture) by high performance liquid chromatography mass spectrometry (HPLC-MS). Cyanidin-3-rutinoside (C3R) and Cyanidin-3-glucoside showed (C3G) high abundance in tart cherry.

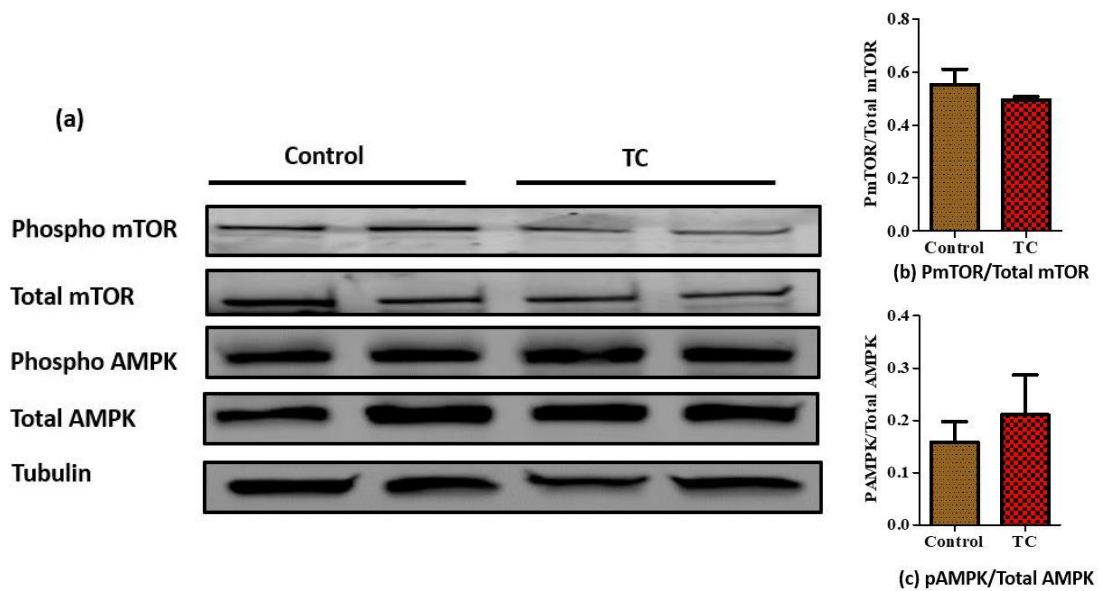

**Figure S2.** Expression of phospho-mTOR and phospho-AMPK in epididymal adipose tissue of Zucker fatty rats detected by western blot. (a) Phospho-mTOR, total mTOR, phospho-AMPK, total AMPK, and tubulin protein levels were examined using western blot. Tubulin was used as an internal loading control; (b) Phospho-mTOR/Total mTOR, (c) Phospho-AMPK/Total AMPK.  $p > 0.05$ , ( $n = 8$ /group).

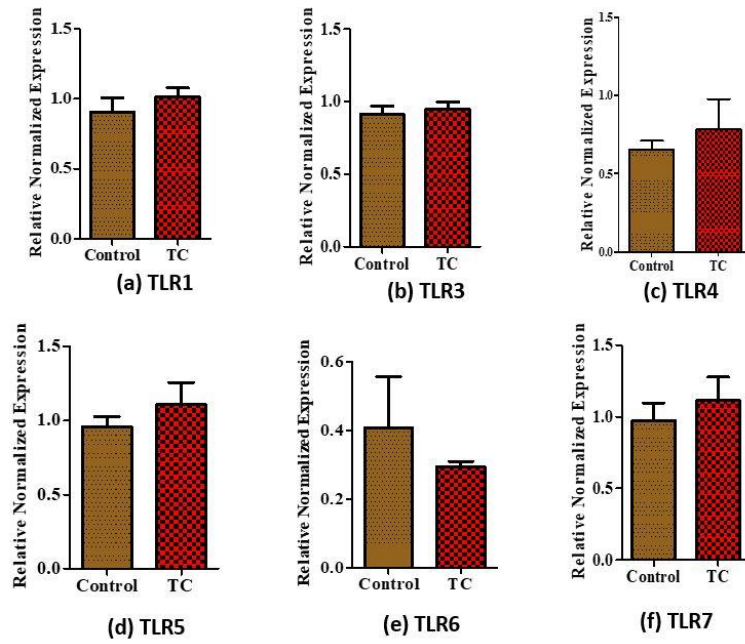

**Figure S3.** Relative normalized mRNA expression of toll like receptor (TLRs) in rat epididymal adipose tissue. None of the TLRs shown are reduced by tart cherry.  $p > 0.05$ , ( $n = 11/\text{group}$ ).

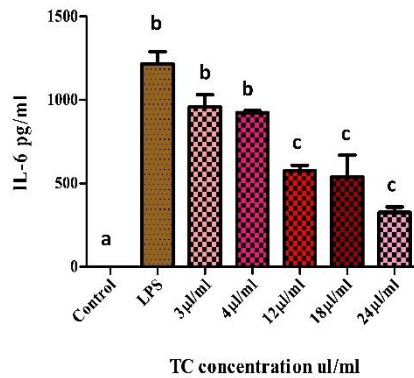

**Figure S4.** Dose-dependent reduction of IL-6 secretion by 3T3-L1 cells by tart cherry (TC) extracts. Lipopolysaccharide (LPS) induced IL-6 secretion from 3T3-L1 adipocytes was dose-dependently reduced by increasing concentrations of tart cherry extracts with 12  $\mu\text{L}/\text{mL}$  achieving maximal effective dose. a, b, c different letters are significantly different,  $p < 0.05$ , three independent experiments.

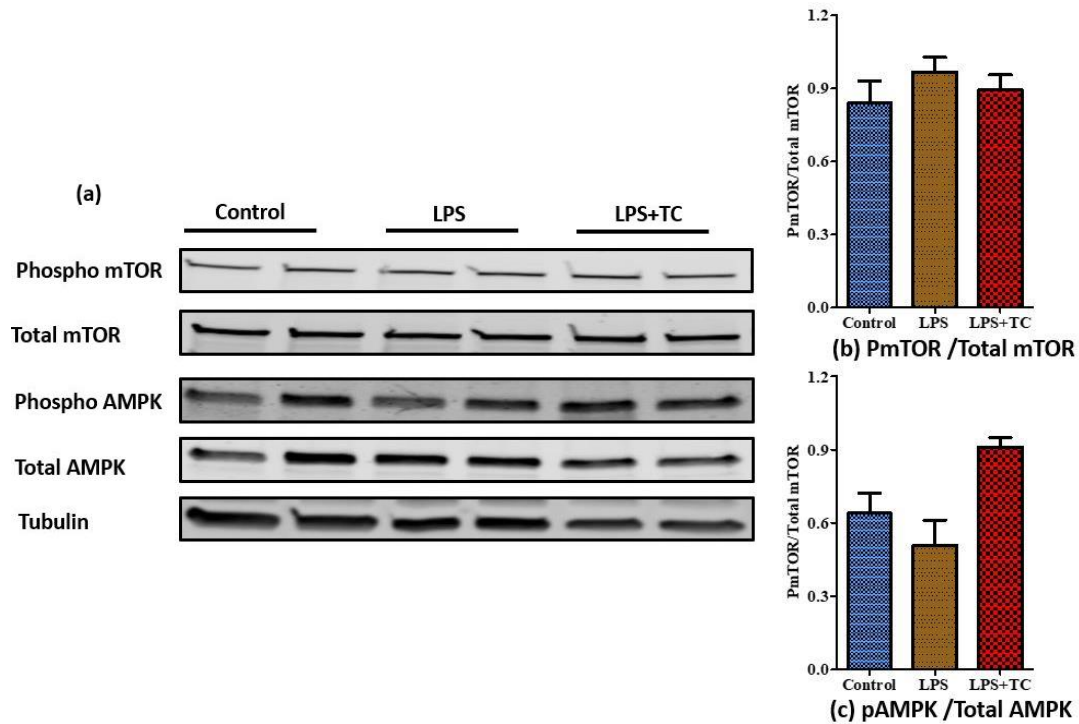

**Figure S5.** Expression levels of mTOR, AMPK and tubulin in 3T3-L1 adipocytes detected by western blot. (a) Phospho-mTOR, total mTOR, phospho-AMPK, total AMPK, and tubulin protein levels were examined using western blot. Tubulin was used as an internal loading control; (b) Phospho-mTOR/Total mTOR, (c) Phospho-AMPK/Total AMPK.  $p > 0.05$ , three independent experiments.

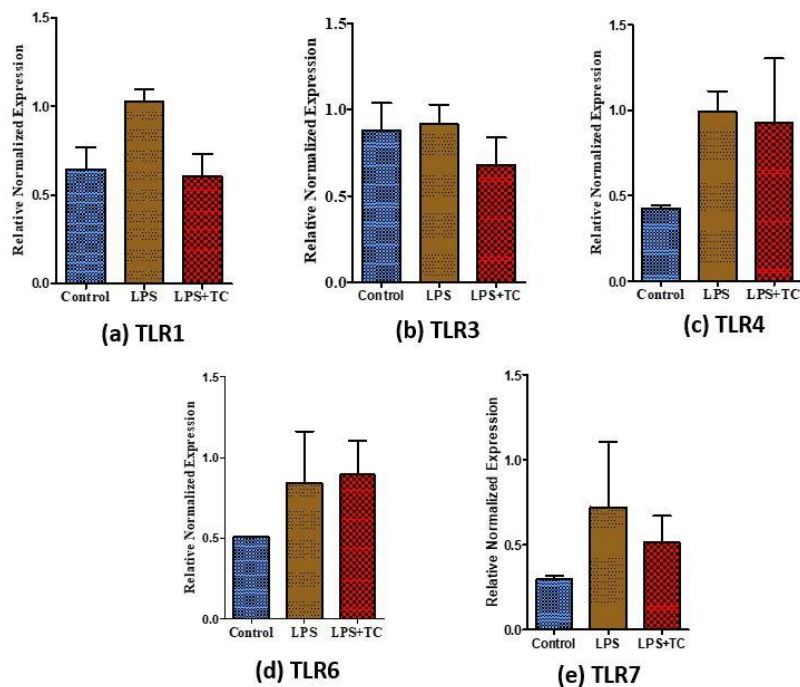

**Figure S6.** Relative normalized mRNA expression of toll like receptors (TLRs) in 3T3-L1 adipocytes. None of the TLRs tested show significant reduction by tart cherry treatment in 3T3-L1 adipocytes.  $p > 0.05$ , three independent experiments.

**Table S1.** Effects of tart cherry on hormone and metabolic parameters in Zucker fatty rats.

| <b>Parameter</b>     | <b>Control</b> | <b>Tart cherry (TC)</b> |
|----------------------|----------------|-------------------------|
| Cholesterol (mg/dL)  | 211.2 ± 24.26  | 189.4 ± 18.72           |
| Triglyceride (mg/dL) | 576.3 ± 113.3  | 500.1 ± 66.78           |
| Glucose (mg/dL)      | 158.8 ± 5.77   | 154.4 ± 6.66            |
| Insulin (pg/mL)      | 4804 ± 475.6   | 5266 ± 510.9            |
| Adiponectin (ng/mL)  | 3245 ± 163.1   | 3059 ± 209.3            |
| Leptin               | AD             | AD                      |

None of these values are significant. Values are expressed as the mean ± SEM ( $n = 11$ ). Control, normal diet; TC, 4% TC diet ( $n = 11$ /group) at week 8. AD: above detection.
